# Supplementary material
Source: Springer Nature journal article supplement (https://www.springermedizin.de/resource/supplementary/13063_2012_1117_MOESM1_ESM.pdf/9619356)
Supplement: MOESM1 [file 9619356]

Participants recruit

Gangdong Kyung Hee University Hospital outpatient

Screening

Informed consent, Hwa-byung SCID, Medical History

Screening failure  
(Inclusion  
& Exclusion criteria)

Randomization; 48 participants

MuTH Group  
n=24

Control Group  
n=24

Scale assessment at baseline

Oriental Medicine  
Music Therapy  
8 sessions  
(2sessions/week)

Control  
Music Therapy  
8 sessions  
(2sessions/week)

Scale assessment

After the last session & follow-up (4 weeks after)

Drop-out  
(Protocol violation)

Data Management & Analysis

Per protocol, Intention-to-treat data set
